# Supplementary material for: New putative phenol oxidase in ascidian blood cells
Source: Springer Nature journal article supplement (doi:10.1038/s41598-022-18283-9), 2022-08-22
Supplement: 41598_2022_18283_MOESM1_ESM.pdf [file 41598_2022_18283_MOESM1_ESM.pdf]

## **New putative phenoloxidase in ascidian blood cells**

Daugavet M.A.<sup>1\*</sup>, Dobrynina M.I.<sup>1</sup>, Shaposhnikova T.G.<sup>2</sup>, Solovyeva A.I.<sup>1,3</sup>, Mittenberg A.<sup>1</sup>, Shabelnikov S.V.<sup>1</sup>, Babkina I.<sup>2</sup>, Grinchenko A.<sup>4</sup>, Ilyaskina D.<sup>4,5</sup>, Podgornaya O.I.<sup>1,2</sup>

1 Institute of Cytology of Russian Academy of Sciences, St. Petersburg, Russia.

2 Saint-Petersburg State University, St. Petersburg, Russia.

3 Zoological Institute of Russian Academy of Sciences, St. Petersburg, Russia.

4 A.V.Zhirmunsky National Scientific Center of Marine Biology, Vladivostok, Russia.

5 Vrije Universiteit Amsterdam, HV The Netherlands.

\*Corresponding author: E-mail: [ka6tanka@yandex.ru](mailto:ka6tanka@yandex.ru)

## **Supplementary information**

Domains   
Sru\_Tuph MKKYKKDTSNFGFHNAAGTHVFPYQCMGPDGNMAGCCYHGARLNFAMWHRAELLNFEEGL  
peptides -----AELLNFEEGL

Domains  TYR  
Sru\_Tuph TRHLKDKTLGLPYWDWLKYPEPPALVWSKKLYGKENPFTSMTIRYDTPHTLTQRSPTVY  
peptides TR-----ENPFTSMTIRYDTPHTLTQRSPTVY

Domains   
Sru\_Tuph PFMVKVSKDNYYVAQKLMQSHTIHEFSEALENSHNTIHAGICWGKESAAGKCTYSMGS LT  
peptides PFMVK-----

Domains   
Sru\_Tuph YAGFDPVFFFHHANVDRLFSVFNWMSAHGEEAWTRQSVLEPQENIFHF  
peptides -----

**Supplementary Figure S1. Peptides of 26 kDa band of *Styela rustica*.**

Alignment of tryptic peptides from 26 kDa protein band with *in silico* translated *Tuphoxin* transcript of *S. rustica* (Sru\_Tuph). Tryptic peptides are merged in longer sequences. Predicted conserved domain of tyrosinase (TYR) is marked by orange rectangle.

Domains 

Sca\_Tuph KDSSTFGFHNAGGTHEFPFQCMGSSGEDKGCCYHGARLNFVMWHRAELLNFEEGLSRHLR  
 peptides -----AELLNFEEGLTR

Domains  TYR

Sca\_Tuph DKTLGLPYWDWLTYPNPPPLVWSKKLYNKANPFTSGLVRYDTKPHTLTQRSPTVDPFMVK  
 peptides -----SPTVDPFMVK

Domains 

Sca\_Tuph MSKDNYVARKLMQSHSIEHFSEALENSHNTIHSSICWGAQQKAGKCEFSMGGLTYAAFD  
 peptides -----

Domains 

Sca\_Tuph PVFFFHHTNVDRLFVSFQNWMTNNNEVAWTRQSVLEPQENIFHFNQPFLPFNNRSLTPFK  
 Peptides -----

**Supplementary Figure S2. Peptides of 26 kDa band of *Styela canopus*.**

Alignment of tryptic peptides from 26 kDa band with *in silico* translated *Tuphoxin* transcript of *Styela canopus* (Sca\_Tuph). Tryptic peptides are merged in longer sequences, with aa substitutions compared to translated transcript highlighted in yellow. Predicted conserved domain of tyrosinase (TYR) is marked by orange rectangle.

|           |                                                                                          |     |
|-----------|------------------------------------------------------------------------------------------|-----|
| Hau_Tuph1 | QRDTRNKLVVERLEGPEIDIESEESPFRRDDRENSLDEDEDNVLVYKGEHDHLTKALPGATCE                          | 60  |
| Peptides  | -----                                                                                    |     |
| Hau_Tuph1 | AGYQIKPGCIFCQDIDECTTGTEKTLTVDQLLNADSDGLNNEVTKDQILTFHSEKALAIG                             | 120 |
| Peptides  | -----                                                                                    |     |
| Hau_Tuph1 | KPLTPVKLYYRQPCSTLGSMTMVQNLHLNKKDKIPDMIITYVCVRSBSTNMYRIKSVFDKEA                           | 180 |
| Peptides  | -----                                                                                    |     |
| Domains   |  TSP   |     |
| Hau_Tuph1 | KWTEWTTWTACKPTIWGGLQTRARICKKGLVGYGKCLGSASAYRECYRGKKEALRVREA                              | 240 |
| Peptides  | -----                                                                                    |     |
| Domains   |  *     |     |
| Hau_Tuph1 | NLTTLTAQKSDLIQAMKKYKDDLSTYGYHQAGTHFWPNECVKPNGVSGACCYHGAKVNFV                             | 300 |
| Peptides  | -----                                                                                    |     |
| Domains   |  * TYR |     |
| Hau_Tuph1 | MWHRAELLYYEQGLTRHLKDKKLGAPYWDWLVPNPPQLVWAKTIGGKPNPFAGSKIRYD                              | 360 |
| Peptides  | -----KTIGGKPNPFAGSKI---                                                                  |     |
| Domains   |  *     |     |
| Hau_Tuph1 | LPVVISTARSPAVSSSSVSMAKSIFQTITSKLARSHMIHEYSESSLESSHNNIHSVCHAD                             | 420 |
| Peptides  | -----                                                                                    |     |
| Domains   |  *      |     |
| Hau_Tuph1 | TGCDYSMGELEYAAYDPIFFFHANVDRLFSVVFQSHMVKKKDMAWTRQGFLEPSENIYHF                             | 480 |
| Peptides  | -----                                                                                    |     |
| Hau_Tuph1 | NEPYQPFNRKTLTPFKKLRVANSIADLLYYEQLLGYKYDSLKAHNTKLNTKDAIEEKSHV                             | 540 |
| Peptides  | -----RVANSIADLLYYEQLLGYKYDSLKA-----                                                      |     |
| Hau_Tuph1 | PTKTDVVVLAQYEQSTGLNVKMRYFYAGGTTPLPPCASIADSNAAYLGTLTILGSRKERA                             | 600 |
| Peptides  | -----                                                                                    |     |
| Hau_Tuph1 | WTAKQPTLLDITSKLTELEATLTSNIKIKACYTHGMGCQSKCKEIFATVRTKIPAPQTIL                             | 660 |
| Peptides  | -----                                                                                    |     |
| Domains   |      |     |
| Hau_Tuph1 | YPSNIDVDIIKFRWDVGHRRMPIGKIVVNAGKEYIYFWGKEAKNVVQVGRTCYDSCSAMGG                            | 720 |
| Peptides  | -----                                                                                    |     |
| Domains   |  CuOx |     |
| Hau_Tuph1 | KTVNCPYGCALPAGSHFFVNKKYCKSGLKLGILSVI                                                     | 756 |
| Peptides  | -----                                                                                    |     |

### Supplementary Figure S3. Peptides of 48 kDa band of *Halocynthia aurantium*.

Alignment of tryptic peptides from 48 kDa band of morula cells with *in silico* translated *Tuphoxin* transcript of *H. aurantium* (Hau\_Tuph1). Tryptic peptides are merged in longer sequences. Predicted conserved domains are marked by rectangles: green (thrombospondin first type repeat - TSP1), orange (tyrosinase - TYR) and blue (domain of cupredoxin family – CuOx). Asterisks (\*) indicate the active site amino acids.



|           |                                                                                          |     |
|-----------|------------------------------------------------------------------------------------------|-----|
| Hau_Tuph1 | QRDTRNKLVERLEGPEDIESEESPFRDDRENSLDEDEDNVLVYKGEHDHLTKALPGATCE                             | 60  |
| Peptides  | -----                                                                                    |     |
| Hau_Tuph1 | AGYQIKPGCIFCQDIDECTTGTEKTLTVDQLLNADSDGLNNEVTKDQILTFHSEKALAIG                             | 120 |
| Peptides  | -----ALAIG                                                                               |     |
| Hau_Tuph1 | KPLTPVKLYYRQPCSTLGSTMVQNLHLNKDKIPDMIITYVCVRSNSTMYRIKSVFDKEA                              | 180 |
| Peptides  | KPLTPVK----QPCSTLGSTMVQNLHLNKDKIPDMIITYVCV-----IKSVFDKEA                                 |     |
| Domains   | 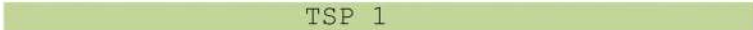 TSP 1  |     |
| Hau_Tuph1 | KWTEWTTWTACKPTIWGGLQTRARICKKGLVGYGKCLGSASAYRECYRGKKEALRVRREA                             | 240 |
| Peptides  | K-----KGLVGYGKCLGSASAYR-----REA                                                          |     |
| Domains   |        |     |
| Hau_Tuph1 | NTLTTAQKSDLIQAMKKYKDDLSTYGYHQAAGTHFWPNECVKPNGVSGACCYHGAKVNFV                             | 300 |
| Peptides  | NTLTTAQKSDLIQAMKKYKDDLSTYGYHQAAG-----GVSGACCYHGAKVNFV                                    |     |
| Domains   |  TYR   |     |
| Hau_Tuph1 | MWHRAELLYYEQGLTRHLKDKKLGAPYWDWLVYPNPPQLVWAKTIGGKPNPFAGSKIRYD                             | 360 |
| Peptides  | MWHRAELLYYEQGLTR-----TIGGKPNPFAGSKIRYD                                                   |     |
| Domains   |        |     |
| Hau_Tuph1 | LPVVISTARSPAVSSSSVSMKSIFFQITITSKLARSHMIHEYSESLESSHNNIHSVCHAD                             | 420 |
| Peptides  | LPVVISTARSPAVSSSSVSMKSIFFQITITSK-----                                                    |     |
| Domains   |         |     |
| Hau_Tuph1 | TGCDYSMGELEYAAYDPIFFFHHANVDRLFVSFQSHMVKKKDMAWTRQGFLEPSENIYHF                             | 480 |
| Peptides  | -----LFSVFQSHMVK-----QGFLEPSENIYHF                                                       |     |
| Hau_Tuph1 | NEPYQPFNRKTLTPFKLRVANSIADLLYYEQLLGYKYDSLKAHNTKLNTKDAIEEKSHV                              | 540 |
| Peptides  | NEPYQPFNR-----                                                                           |     |
| Hau_Tuph1 | PTKTDVVVLAQYEQSTGLNVKMRIFYAGGTTPLPPCASIADSNAAYLGTTLTILGSRKERA                            | 600 |
| Peptides  | -----                                                                                    |     |
| Hau_Tuph1 | WTAKQPTLLDITSKLLEATLTSNIKIKACYTHGMGCQSKCKEIFATVRTKIPAPQITIL                              | 660 |
| Peptides  | -----                                                                                    |     |
| Domains   |      |     |
| Hau_Tuph1 | YPSNIDVDIIKFRWDVGHMPIGKIVVNAGKEYIYFWGKEAKNVVQVGRTCYDSCSAMGG                              | 720 |
| Peptides  | -----                                                                                    |     |
| Domains   |  CuOx |     |
| Hau_Tuph1 | KTVNCPYGCALPAGSHFFVNKKYCKSGLKLGILSVI                                                     | 756 |
| Peptides  | -----                                                                                    |     |

**Supplementary Figure S4. Peptides of 35 kDa band of *Halocynthia aurantium*.**

Alignment of tryptic peptides from 35 kDa band of morula cells with *in silico* translated *Tuphoxin* transcript of *H. aurantium* (Hau\_Tuph1). Tryptic peptides are merged in longer sequences. Predicted conserved domains are marked by rectangles: green (thrombospondin first type repeat - TSP1), orange (tyrosinase - TYR) and blue (domain of cupredoxin family – CuOx).

|           |                                                                                            |     |
|-----------|--------------------------------------------------------------------------------------------|-----|
| Hau_Tuph1 | QRDTRNKLVERLEGPEIDIESEESPFRDDRENSLDEDEDNVLVYKGEHDHLTKALPGATCE                              | 60  |
| Hau_Tuph2 | -----                                                                                      | 0   |
| Peptides  | -----                                                                                      |     |
| Hau_Tuph1 | AGYQIKPGCIFCQDIDECTTGTEKTLTVDQLLNADSDGLNNEVTKDQILTFHSEKALAIG                               | 120 |
| Hau_Tuph2 | -----                                                                                      | 0   |
| Peptides  | -----ALAIG                                                                                 |     |
| Hau_Tuph1 | KPLTPVKLYYRQPCSTLSTLMVQNLHLNKKDKIPDMIITYVCVRSRGSTNMYRIKSVFDKEA                             | 180 |
| Hau_Tuph2 | -----MVQNLHLNKKDKIPDMIITYVCVRSRGSTNMYRIKSVFDKE-                                            | 39  |
| Peptides  | KPLTPVK-----                                                                               |     |
| Domains   | 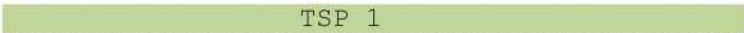 TSP 1   |     |
| Hau_Tuph1 | KWTEWTTWTACKPTIWGGLQTRARICKKGLVGYGKCLGSASAYRECYRGKKEALRVRREA                               | 240 |
| Hau_Tuph2 | -----ALRVRREA                                                                              |     |
| Peptides  | -----                                                                                      |     |
| Domains   |  *       |     |
| Hau_Tuph1 | NLTTLTAQKSDLIQAMKKYKDDLSTYGYHQAAGTHFWPNECVKPNGVSGACCYHGAKVNFV                              | 300 |
| Hau_Tuph2 | NLTTLTAQKSDLIQAMKKYKDDLSTYGYHQAAGTHFWPNECVKPNGVSGACCYHGAKVNFV                              | 107 |
| Peptides  | -----                                                                                      |     |
| Domains   |  *       |     |
| Hau_Tuph1 | MWHRAELLYEQGLTRHLKDKKLGAPYWDWLVPNPPQLVWAKTIGGKPNPFAGSKIRYD                                 | 360 |
| Hau_Tuph2 | MWHRAELLYEQGLTRHLKDKKLGAPYWDWLVPNPPQLVWAKTIGGKPNPFAGSKIRYD                                 | 167 |
| Peptides  | ----AELLYEQGLTR-----                                                                       |     |
| Domains   |  TYR * * |     |
| Hau_Tuph1 | LPVVISTARSPAVSSSSVSMAKSIFQTITSKLARSHMIHEYSESLESSHNNIHSVCHAD                                | 420 |
| Hau_Tuph2 | LPVVISTARSPAVSSSSVSMAKSIFQTITSKLARSHMIHEYSESLESSHNNIHSVCHAD                                | 227 |
| Peptides  | -----                                                                                      |     |
| Domains   |  *      |     |
| Hau_Tuph1 | TGCDYSMGELEYAAYDPIFFFHHANVDRLFVSVFQSHMVKKKDMAWTRQGFLEPSENIYHF                              | 480 |
| Hau_Tuph2 | TGCDYSMGELEYAAYDPIFFFHHANVDRLFVSVFQSHMVKKKDMAWTRQGFLEPSENIYHF                              | 287 |
| Peptides  | -----                                                                                      |     |
| Hau_Tuph1 | NEPYQPFNRKTLTPFKKLRVANSIADLLYEQLLGYKYDSLKAHNTKLNKDAIEEKSHV                                 | 540 |
| Hau_Tuph2 | NEPYQPFNRKTLTPFKKLRVANSIADLLYEQLLGYKYDSLKAHNTKLNKDAIEEKSHV                                 | 347 |
| Peptides  | -----SHV                                                                                   |     |
| Hau_Tuph1 | PTKTDVVVLAQYEQSTGLNVKMRIFYAGGTTPLPPCASIADSNAAYLGTTLILGSRKERA                               | 600 |
| Hau_Tuph2 | PTKTDVVVLAQYEQSTGLNVKMRIFYAGGTTPLPPCASIADSNAAYLGTTLILGSRKERA                               | 407 |
| Peptides  | PTKTDVVVLAQYEQSTGLNV-----                                                                  |     |
| Hau_Tuph1 | WTAKQPTLLDITSKLTELEATLTSNIKIKACYTHGMGCQSKCKEIFATVVRTKIPAPQTIL                              | 660 |
| Hau_Tuph2 | WTAKQPTLLDITSKLTELEATLTSNIKIKACYTHGMGCQSKCKEIFATVVRTKIPAPQTIL                              | 467 |
| Peptides  | ---KQPTLLDITSKLTELEATLTSNIK-----TKIPAPQTIL                                                 |     |
| Domains   |        |     |
| Hau_Tuph1 | YPSNIDVDIIKFRWDVGHHRMPIGKIVVNAGKEYIYFWGKEAKNVVQVGRTCYDSCSAMGG                              | 720 |
| Hau_Tuph2 | YPSNIDVDIIKFRWDVGHHRMPIGKIVVNAGKEYIYFWGKEAKNVVQVGRTCYDSCSAMGG                              | 527 |
| Peptides  | YPSNIDVDIIK--WDVGH-----EYIYFWGK---NVVQVGR-----                                             |     |
| Domains   |  CuOx   |     |
| Hau_Tuph1 | KTVNCPYGCALPAGSHFFVNKKYCKSGLKLGILSVI                                                       | 756 |
| Hau_Tuph2 | KTVNCPYGCALPAGSHFFVNKKYCKSGLKLGILSVI                                                       | 563 |
| Peptides  | -TVNCPYGCALPAGSHFFVNK-----                                                                 |     |

**Supplementary Figure S5. Alignment of two *Tuphoxin* transcripts of *Halocynthia aurantium*.**

Alignment of tryptic peptides from 26 kDa band of morula cells with two *in silico* translated *Tuphoxin* transcripts of *H. aurantium* (Hau\_Tuph1 and Hau\_Tuph2). Tryptic peptides are merged in longer sequences. Predicted conserved domains are marked by rectangles: green (thrombospondin first type repeat - TSP1), orange (tyrosinase - TYR) and blue (domain of cupredoxin family – CuOx). Asterisks (\*) indicate the active site amino acids.

|           |                                                                                         |     |
|-----------|-----------------------------------------------------------------------------------------|-----|
| Hau_Tuph1 | WTAKQPTLLDITSKLTELEATLTSNIKIKACYTHGMGCQSKCKEIFATVVRTKIPAPQTIL                           | 660 |
| Peptides  | -----LTELEATLTSNIK-----                                                                 |     |
| Domains   |      |     |
| Hau_Tuph1 | YPSNIDVDIIKFRWDVGHHRMPIGKIVVNAGKEYIYFWGKEAKNVVQVGRTCYDSCSAMGG                           | 720 |
| Peptides  | -----EYIYFWGK-----                                                                      |     |
| Domains   |  CuOx |     |
| Hau_Tuph1 | KTVNCPYGCALPAGSHFFVNKKYCKSGLKLGILSVI                                                    | 756 |
| Peptides  | -----                                                                                   |     |

**Supplementary Figure S6. Peptides of 26 kDa band of *Halocynthia aurantium* hyalinocytes.**

Alignment of tryptic peptides from 26 kDa band of hyalinocytes with *in silico* translated *Tuphoxin* transcript of *H. aurantium* (Hau\_Tuph1). Predicted conserved domain of cupredoxin family (CuOx) is marked by blue rectangle.



|           |                                                                        |     |
|-----------|------------------------------------------------------------------------|-----|
| Sru_Tuph  | -----                                                                  | 0   |
| Sca_Tuph  | MREALVITLLWVCVAVTQVEGRKKTCAVNFVGGCDKSRGLCWNTDGGKSSMCSCKAGYRFR          | 60  |
| Hau_Tuph1 | -----                                                                  | 0   |
| Hau_Tuph2 | -----                                                                  | 0   |
| Domains   | + + EGF_CA1 +                                                          |     |
| Sru_Tuph  | -----                                                                  | 0   |
| Sca_Tuph  | LPHTRRGRCVDINECRANLHSCDTKNGGCTNTIGSHRCYCKKGFVLDYTKTKLRRKHIK            | 120 |
| Hau_Tuph1 | -----                                                                  | 0   |
| Hau_Tuph2 | -----                                                                  | 0   |
| Domains   | + +                                                                    |     |
| Sru_Tuph  | -----                                                                  | 0   |
| Sca_Tuph  | GTCRGRRCGRRCNRFRYDAEDEDASKFLLRLLRRRKGRCVCEPGFAKRRGCKYQCINE             | 180 |
| Hau_Tuph1 | -----                                                                  | 0   |
| Hau_Tuph2 | -----                                                                  | 0   |
| Domains   | EGF_CA2 +                                                              |     |
| Sru_Tuph  | -----CGFKCYEPTKRPSTCNSESFQSSSL                                         | 26  |
| Sca_Tuph  | CRLRISMCDLRRGYCHNSDGGYFCSCRKGYVLGPCGFKCYRPPKRPSCNSEIFKSSSLA            | 240 |
| Hau_Tuph1 | -----                                                                  | 0   |
| Hau_Tuph2 | -----                                                                  | 0   |
| Sru_Tuph  | KGDS DGLNDETTKAVLLDYITEKIAKSGGKLSLFHTLMYKTCKTGGAQRVQRFVDVDGDGK         | 86  |
| Sca_Tuph  | KGDS DGLNDETTKAVLLDYITEKIAKAGGRLTLFHTLMYKTCKTGQKKRIQRFDINRDGK          | 300 |
| Hau_Tuph1 | -----MVQNLHLNKKDKI                                                     | 12  |
| Hau_Tuph2 | -----MVQNLHLNKKDKI                                                     | 12  |
|           | :*.:*.:* :*                                                            |     |
| Domains   | TSP 1                                                                  |     |
| Sru_Tuph  | TDIIINYVCVGL---KWTVKNVFDTEAKWETWSCWNTCKPTCSGGIQTRTRICKHGLVG            | 142 |
| Sca_Tuph  | DDLVIHYVCVGN---KWTVKAVYEEEARWAPWTCWTSCKPTCSGGIQTRVRICKNGLVG            | 356 |
| Hau_Tuph1 | PDMIITYCVRSNSTMYRIKSVFDKEAKWETWTTWTACKPTIWGGLQTRARICKKGLVG             | 72  |
| Hau_Tuph2 | PDMIITYCVRSNSTMYRIKSVFDKE-----                                         | 39  |
|           | *.:* *.* * : * *.:* *                                                  |     |
| Domains   |                                                                        |     |
| Sru_Tuph  | EGRCKGPATEYKECYTGRKCKLRVREAHSLNRVQKKDLIQAMKKYKDDTSTNFGFHNAAG           | 202 |
| Sca_Tuph  | EGKCKGRATQYKTCYTGKCCPLRVREAHSLNTRQKKDLIQAMEKYKDDSTSTFGFHNAAG           | 416 |
| Hau_Tuph1 | YGKCLGSASAYRECYRGKKEALRVREANTLTTAQKSDLIQAMKKYKDDLSTYGYHQAAG            | 132 |
| Hau_Tuph2 | -----ALRVREANTLTTAQKSDLIQAMKKYKDDLSTYGYHQAAG                           | 79  |
|           | *****:*. *.*****:***. *.:*.:*.*                                        |     |
| Domains   |                                                                        |     |
| Sru_Tuph  | THVFPYQCMGPDGNMAGCCYHGARLNFAMWHRRAELLNFEEGLTRHLKDKTLGLPYWDWLK          | 262 |
| Sca_Tuph  | THEFPFQCMGSSGEDKGCYHGARLNFVMWHRRAELLNFEEGLSRHLRDKTLGLPYWDWLT           | 476 |
| Hau_Tuph1 | THFWPNECVKPNGVSGACCYHGAKVNFVMWHRRAELLYEQGLTRHLKDKKLGAPYWDWL            | 192 |
| Hau_Tuph2 | THFWPNECVKPNGVSGACCYHGAKVNFVMWHRRAELLYEQGLTRHLKDKKLGAPYWDWL            | 139 |
|           | ** : * : * : * . * .*****:*. ***** : * : * : * : * : * : * : * : * : * |     |
| Domains   | TYR                                                                    |     |
| Sru_Tuph  | YPEPPALVWSKKLYGKENPFTSMTIRYDTPHTLTQRSPTVYPFMVKSKDNYY-VAQKL             | 321 |
| Sca_Tuph  | YPNPPPLVWSKKLYNKANPFTSGLVRYDTPHTLTQRSPTVDPFMVKMSKDNYY-VARKL            | 535 |
| Hau_Tuph1 | YPNPPQLVWAKTIGGKPNPFAGSKIRYDLPVVISSTARS PAVSSSSVSMKSI FQTITSKL         | 252 |
| Hau_Tuph2 | YPNPPQLVWAKTIGGKPNPFAGSKIRYDLPVVISSTARS PAVSSSSVSMKSI FQTITSKL         | 199 |
|           | ** : * * : * : * . * * : * : * : * : * : * : * : * : * : * : * : * : * |     |
| Domains   |                                                                        |     |
| Sru_Tuph  | MQSHTIHEFSEALENSHNTI HAGICWGKESAAGKCTYSMGLTYAGFDPVFFFHHANVDR           | 381 |
| Sca_Tuph  | MQSHTIHEFSEALENSHNTI HSSICWGAQQKAGKCEFSMGGLTYAADFDPVFFFHHTNVDR         | 595 |
| Hau_Tuph1 | ARSHMIHEYSESLSSHNNIHS AVCHA----DTGCDYSMGELEYAAYDPIFFFHHANVDR           | 308 |
| Hau_Tuph2 | ARSHMIHEYSESLSSHNNIHS AVCHA----DTGCDYSMGELEYAAYDPIFFFHHANVDR           | 255 |
|           | : * * : * : * : * . * : * : * * * : * : * : * : * : * : * : * : *      |     |
| Domains   |                                                                        |     |
| Sru_Tuph  | LFSVFNWMSAHGEEAWTRQSVLEPQENIFHFNEPYLPFRNKTLTPFKKLQELASIQNMF            | 441 |
| Sca_Tuph  | LFSVFNWMTNNEVAWTRQSVLEPQENIFHFNQPF LFPNRRSLTPFKKLHALSTIQDLF            | 655 |
| Hau_Tuph1 | LFSVFNWMSAHGEEAWTRQSVLEPQENIFHFNEPYLPFRNKTLTPFKKLQELASIQNMF            | 368 |
| Hau_Tuph2 | LFSVFNWMSAHGEEAWTRQSVLEPQENIFHFNEPYLPFRNKTLTPFKKLQELASIQNMF            | 315 |
|           | *****. * : : *****.***.***:***. * : * : * : * : * : * : * : *          |     |
| Sru_Tuph  | YYRELLGYRYDNLAV-----                                                   | 456 |
| Sca_Tuph  | FNRELLGYRYDSLKVPKEKKTKKVGDDEEKAHIPSSGDKLMLGQFERNIRTNVKITYFFAN          | 715 |
| Hau_Tuph1 | YYEQLLGYKYDSLKAHNTKLNKDAIEEKSHVPTKTDVVVLAQYEQSTGLNVKMRYFYAG            | 428 |
| Hau_Tuph2 | YYEQLLGYKYDSLKAHNTKLNKDAIEEKSHVPTKTDVVVLAQYEQSTGLNVKMRYFYAG            | 375 |
|           | : . : * : * : * : * .                                                  |     |
| Sru_Tuph  | -----                                                                  | 456 |
| Sca_Tuph  | KIKGFKDIKTC SKLNEDETRYLASAQILGSKRERAWKSRQPTVVDI SNLFGKLTWQQRRT         | 775 |
| Hau_Tuph1 | G---TTPLPPCASIADSNAAYLGTLTILGSRKERAWTAKQPTLLDITSKLTELE-----            | 479 |
| Hau_Tuph2 | G---TTPLPPCASIADSNAAYLGTLTILGSRKERAWTAKQPTLLDITSKLTELE-----            | 426 |
| Sru_Tuph  | -----                                                                  | 456 |
| Sca_Tuph  | SGLSATSNIQIRACYTHNLS CRKNCKQIRSRVKKLIPSPQLILYPKNIRTDIQKIEWAND          | 835 |
| Hau_Tuph1 | --ATLTSNIKIKACYTHGMGCQSKCKEIFATVVRTKI PAPQTILYPSNIDVDI IKFRWDVG        | 537 |
| Hau_Tuph2 | --ATLTSNIKIKACYTHGMGCQSKCKEIFATVVRTKI PAPQTILYPSNIDVDI IKFRWDVG        | 484 |
| Domains   | CuOx                                                                   |     |
| Sru_Tuph  | -----                                                                  | 456 |
| Sca_Tuph  | VRLPTWTIDAVSGTRWVFWGSEAKNVVQVARRAYLTCNTRGARKVRCETACVLPSTGIH            | 895 |
| Hau_Tuph1 | HRMPIGKIVVAGKEYIYFWGKEAKNVVQVG-RTCYDSCSAMGGKTVNCPYGCALPAGSH            | 596 |
| Hau_Tuph2 | HRMPIGKIVVAGKEYIYFWGKEAKNVVQVG-RTCYDSCSAMGGKTVNCPYGCALPAGSH            | 543 |
| Domains   |                                                                        |     |
| Sru_Tuph  | -----                                                                  | 456 |
| Sca_Tuph  | YFVHKTRCRRGMKLSVLAHL                                                   | 915 |
| Hau_Tuph1 | FFVNKKYCKSGLKLGILSVI                                                   | 616 |
| Hau_Tuph2 | FFVNKKYCKSGLKLGILSVI                                                   | 563 |

**Supplementary Figure S7. Alignment of *Tuphoxin* sequences belonging to *Styela rustica*, *S. canopus* and *Halocynthia aurantium*.**

Alignment of four translated sequences of *Tuphoxins* belonging to *S. rustica* (Sru\_Tuph), *S. canopus* (Sca\_Tuph), and *H. aurantium* (Hau\_Tuph1, Hau\_Tuph2). Predicted conserved domains are marked by rectangles: grey (calcium-binding EGF-like – EGF\_CA), green (thrombospondin first type repeat - TSP1), orange (tyrosinase - TYR), blue - cupredoxin family domain (CuOx).



**A** Adhesion G protein-coupled receptor B3 of *Homo sapiens* - O60242 (AGRB3\_HUMAN)  
Expect = 6e-10 Identities = 21/46 (46%)

```
TSP1    1    WETWSCWNTCKPTCSGGIQTRTRICKHGLVGEGRCKGPATEYKEYC 46
          W+ WS W  C  TCS G Q R+R C      G  C+GP  E +ECY
AGRB3  403 WQEWSSWSQCSVTCSNGTQQRSRQCTAAAHGGSECRGPWAESRECY 448
```

**B** Zinc metalloproteinase nas-36 OS of *Caenorhabditis briggsae* - Q61EX6 (NAS36\_CAEBR)  
Expect = 3e-06 Identities = 23/53 (43%)

```
TSP1    1    WAPWTCWTSCKPTCSG-GIQTRVTRICKNGLVGEGKCKGRATQYKTCYTGKKCP 52
          WA W  W+ C  TC G GI++RVR C+      KC+GR  ++ TC  K CP
NAS36  509 WADWGEWSMCSRTCGGCGIRSRVRSRCS-----KKCEGRRQEFGTCNL-KACP 555
```

### Supplementary Figure S8. Results of similarity search for TSP1 domain.

Alignment of Taphoxins sequences of TSP1 belonging to *S. rustica* (*Sru\_Tuph*) (A) and *S. canopus* (*Sca\_Tuph*) (B) with best hit sequences in UniProtKB/Swiss-Prot database.

Supplementary Table S1. Sequences of *Tuphoxin* homologues used for phylogeny construction.

| Colour codes                           |          |                      |                                     |               |
|----------------------------------------|----------|----------------------|-------------------------------------|---------------|
| Ascidacea                              | Annelida | Mollusca             | Fungi                               | Cyanobacteria |
| Database ID                            | DB       | Name                 | Species                             |               |
| Contig_28777 a)                        | de novo  | <b>Sru_Tuphoxin</b>  | <i>Styela rustica</i>               |               |
| Contig_67444 a)                        | de novo  |                      | <i>Styela rustica</i>               |               |
| Contig_7091                            | de novo  | S.rustica.1          | <i>Styela rustica</i>               |               |
| Contig_7704                            | de novo  | S.rustica.2          | <i>Styela rustica</i>               |               |
| Contig_15578                           | de novo  | S.rustica.3          | <i>Styela rustica</i>               |               |
| SC_m.117002.p1                         | GitHub   | <b>Sca_Tuphoxin</b>  | <i>Styela canopus</i>               |               |
| SC_m.152480.p1                         | GitHub   | S.canopus.1          | <i>Styela canopus</i>               |               |
| SC_m.16402.p1                          | GitHub   | S.canopus.2          | <i>Styela canopus</i>               |               |
| SC_m.86302.p1                          | GitHub   | S.canopus.3          | <i>Styela canopus</i>               |               |
| SC_m.42250.p1                          | GitHub   | S.canopus.4          | <i>Styela canopus</i>               |               |
| SC_m.26137.p1                          | GitHub   | S.canopus.5          | <i>Styela canopus</i>               |               |
| AA49_m.7122.p1                         | GitHub   | S.clava.1            | <i>Styela clava</i>                 |               |
| AA49_m.7119.p1                         | GitHub   | S.clava.2            | <i>Styela clava</i>                 |               |
| AA49_m.30831.p1                        | GitHub   | S.clava.3            | <i>Styela clava</i>                 |               |
| AA49_m.87151.p1                        | GitHub   | S.clava.4            | <i>Styela clava</i>                 |               |
| AA49_m.2942.p1                         | GitHub   | S.clava.5            | <i>Styela clava</i>                 |               |
| AA49_m.30764.p1                        | GitHub   | S.clava.6            | <i>Styela clava</i>                 |               |
| AA49_m.72475.p1                        | GitHub   | S.clava.7            | <i>Styela clava</i>                 |               |
| AA49_m.3326.p1                         | GitHub   | S.clava.8            | <i>Styela clava</i>                 |               |
| Haaura.CG.MTP2014.S1292.g08050.02.p    | Aniseed  | <b>Hau_Tuphoxin1</b> | <i>Halocynthia aurantium</i>        |               |
| Haaura.CG.MTP2014.S1209.g07864.01.p    | Aniseed  | H.aurantium.1        | <i>Halocynthia aurantium</i>        |               |
| Phfumi.CG.MTP2014.S5765.g07096.01.p b) | Aniseed  | Ph.mammillata.1      | <i>Phallusia mammillata</i>         |               |
| Phfumi.CG.MTP2014.S5765.g07097.01.p b) | Aniseed  | Ph.mammillata.2      | <i>Phallusia mammillata</i>         |               |
| CAB3267405.1                           | GenBank  | Ph.mammillata.3      | <i>Phallusia mammillata</i>         |               |
| Moocul.CG.ELv1_2.S110138.g11514.01.p   | Aniseed  | M.oculata.1          | <i>Molgula oculata</i>              |               |
| Moocul.CG.ELv1_2.S61057.g03850.01.p    | Aniseed  | M.oculata.2          | <i>Molgula oculata</i>              |               |
| Moocci.CG.ELv1_2.S255256.g05916.01.p   | Aniseed  | M.occidentalis.1     | <i>Molgula occidentalis</i>         |               |
| Moocci.CG.ELv1_2.S565922.g22193.01.p   | Aniseed  | M.occidentalis.2     | <i>Molgula occidentalis</i>         |               |
| Moocci.CG.ELv1_2.S454880.g14754.01.p   | Aniseed  | M.occidentalis.3     | <i>Molgula occidentalis</i>         |               |
| Moocci.CG.ELv1_2.S568724.g22364.01.p   | Aniseed  | M.occidentalis.4     | <i>Molgula occidentalis</i>         |               |
| CJ410700.1                             | GenBank  | M.tectifformis       | <i>Molgula tectifformis</i>         |               |
| XP_026691523.1                         | GenBank  | C.intestinalis.2     | <i>Ciona intestinalis</i>           |               |
| XP_002122867.2                         | GenBank  | C.intestinalis.1     | <i>Ciona intestinalis</i>           |               |
| XP_018672468.2                         | GenBank  | C.intestinalis.3     | <i>Ciona intestinalis</i>           |               |
| XP_018671739.2                         | GenBank  | C.intestinalis.4     | <i>Ciona intestinalis</i>           |               |
| XP_002119675.4                         | GenBank  | C.intestinalis.5     | <i>Ciona intestinalis</i>           |               |
| XP_002128425.2                         | GenBank  | C.intestinalis.6     | <i>Ciona intestinalis</i>           |               |
| Boleac.CG.SB_v3.S604.g12287.01.p       | Aniseed  | B.leachii.1          | <i>Botrylloides leachii</i>         |               |
| Boleac.CG.SB_v3.S604.g12288.01.p       | Aniseed  | B.leachii.2          | <i>Botrylloides leachii</i>         |               |
| Boleac.CG.SB_v3.S227.g05332.01.p       | Aniseed  | B.leachii.3          | <i>Botrylloides leachii</i>         |               |
| Boleac.CG.SB_v3.S227.g05333.01.p       | Aniseed  | B.leachii.4          | <i>Botrylloides leachii</i>         |               |
| Boleac.CG.SB_v3.S227.g05334.01.p       | Aniseed  | B.leachii.5          | <i>Botrylloides leachii</i>         |               |
| Boleac.CG.SB_v3.S227.g05338.01.p       | Aniseed  | B.leachii.6          | <i>Botrylloides leachii</i>         |               |
| Boleac.CG.SB_v3.S195.g04406.01.p       | Aniseed  | B.leachii.7          | <i>Botrylloides leachii</i>         |               |
| Boleac.CG.SB_v3.S281.g06648.01.p       | Aniseed  | B.leachii.8          | <i>Botrylloides leachii</i>         |               |
| JG332329.1                             | GenBank  | B.schlosseri.1       | <i>Botryllus schlosseri</i>         |               |
| JG338731.1                             | GenBank  | B.schlosseri.2       | <i>Botryllus schlosseri</i>         |               |
| AWK28007.2                             | GenBank  | P.prolifica.1        | <i>Phyllochaetopterus prolifica</i> |               |
| AWK28006.2                             | GenBank  | P.prolifica.2        | <i>Phyllochaetopterus prolifica</i> |               |

|                |         |                  |                                    |
|----------------|---------|------------------|------------------------------------|
| AWK28003.1     | GenBank | M. taylori       | <i>Mesochaetopterus taylori</i>    |
| EY523895.1     | GenBank | C. teleta        | <i>Capitella teleta</i>            |
| CAQ64614.1     | GenBank | T. chilensis     | <i>Tonicia chilensis</i>           |
| CAQ64609.1     | GenBank | N. mirandus      | <i>Nuttallochiton mirandus</i>     |
| CAQ64607.1     | GenBank | N. conica        | <i>Notoplax conica</i>             |
| CAQ64615.1     | GenBank | A.fascicularis   | <i>Acanthochitona fascicularis</i> |
| CAQ64608.1     | GenBank | N.fluxa          | <i>Nuttallina fluxa</i>            |
| CAQ64600.1     | GenBank | C.magnificus     | <i>Chiton magnificus</i>           |
| CAQ64603.1     | GenBank | L.radians        | <i>Lepidozona radians</i>          |
| CAQ30429.1     | GenBank | C.bouveti        | <i>Callochiton bouveti</i>         |
| CAQ30427.1     | GenBank | N.lineata        | <i>Nierstraszella lineata</i>      |
| CAQ64612.1     | GenBank | S.brandtii       | <i>Schizoplax brandtii</i>         |
| AYO86686.1     | GenBank | H.pomatia.1      | <i>Helix pomatia</i>               |
| AYO86688.1     | GenBank | H.pomatia.2      | <i>Helix pomatia</i>               |
| AEO51768.1     | GenBank | H.lucorum        | <i>Helix lucorum</i>               |
| AYO86691.1     | GenBank | L.stagnalis      | <i>Lymnaea stagnalis</i>           |
| CEK95569.1     | GenBank | A.vulgaris.1     | <i>Arion vulgaris</i>              |
| CEK81230.1     | GenBank | A.vulgaris.2     | <i>Arion vulgaris</i>              |
| CEK79687.1     | GenBank | A.vulgaris.3     | <i>Arion vulgaris</i>              |
| CEK74026.1     | GenBank | A.vulgaris.4     | <i>Arion vulgaris</i>              |
| CEK95583.1     | GenBank | A.vulgaris.5     | <i>Arion vulgaris</i>              |
| CEK74025.1     | GenBank | A.vulgaris.6     | <i>Arion vulgaris</i>              |
| AYO86690.1     | GenBank | A.vulgaris.7     | <i>Arion vulgaris</i>              |
| AYO86689.1     | GenBank | A.vulgaris.8     | <i>Arion vulgaris</i>              |
| DW255933.1     | GenBank | E.scolopes.1     | <i>Euprymna scolopes</i>           |
| DW256698.1     | GenBank | E.scolopes.2     | <i>Euprymna scolopes</i>           |
| DAC71535.1     | GenBank | A.californica.1  | <i>Aplysia californica</i>         |
| CAD88977.1     | GenBank | A.californica.2  | <i>Aplysia californica</i>         |
| XP_035826072.1 | GenBank | A.californica.3  | <i>Aplysia californica</i>         |
| AYO86685.1     | GenBank | C.aspersum       | <i>Cornu aspersum</i>              |
| PVD31865.1     | GenBank | P.canaliculata.1 | <i>Pomacea canaliculata</i>        |
| PVD32161.1     | GenBank | P.canaliculata.2 | <i>Pomacea canaliculata</i>        |
| PVD32038.1     | GenBank | P.canaliculata.3 | <i>Pomacea canaliculata</i>        |
| CAH10287.1     | GenBank | N.nucleus.1      | <i>Nucula nucleus</i>              |
| CAH10286.1     | GenBank | N.nucleus.2      | <i>Nucula nucleus</i>              |
| CAG28308.1     | GenBank | M.crenulata.1    | <i>Megathura crenulata</i>         |
| 4BED_B         | GenBank | M.crenulata.2    | <i>Megathura crenulata</i>         |
| CAC82192.1     | GenBank | H.tuberculata    | <i>Haliotis tuberculata</i>        |
| ANE23704.1     | GenBank | H.rubra.1        | <i>Haliotis rubra</i>              |
| CX726143.1     | GenBank | H.discus         | <i>Haliotis discus</i>             |
| GT869640.1     | GenBank | H.diversicolor   | <i>Haliotis diversicolor</i>       |
| ABD47516.1     | GenBank | S.officinalis.1  | <i>Sepia officinalis</i>           |
| CBW46988.1     | GenBank | L.cinerea        | <i>Lepidochitona cinerea</i>       |
| AGX25261.1     | GenBank | M.tuberculata    | <i>Melanoides tuberculata</i>      |
| O61363.1       | GenBank | E.dofleini.1     | <i>Enteroctopus dofleini</i>       |
| AAA29391.1     | GenBank | E.dofleini.2     | <i>Enteroctopus dofleini</i>       |
| 4YD9_A         | GenBank | T.pacificus.1    | <i>Todarodes pacificus</i>         |
| 4YD9_B         | GenBank | T.pacificus.2    | <i>Todarodes pacificus</i>         |
| ADT91166.1     | GenBank | S.spirula        | <i>Spirula spirula</i>             |
| AGV74427.1     | GenBank | S.maindroni      | <i>Sepiella maindroni</i>          |



|                |         |                  |                                |
|----------------|---------|------------------|--------------------------------|
| CAF03590.1     | GenBank | N.pompilius      | <i>Nautilus pompilius</i>      |
| XP_014789836.1 | GenBank | O.bimaculoides.1 | <i>Octopus bimaculoides</i>    |
| XP_014779647.1 | GenBank | O.bimaculoides.2 | <i>Octopus bimaculoides</i>    |
| XP_029636914.2 | GenBank | O.sinensis       | <i>Octopus sinensis</i>        |
| HX972596.1     | GenBank | P.acuta          | <i>Physella acuta</i>          |
| ES748875.1     | GenBank | B.glabrata       | <i>Biomphalaria glabrata</i>   |
| JK740481.1     | GenBank | M.acridum        | <i>Metarhizium acridum</i>     |
| FP450128.1     | GenBank | T.melanosporum   | <i>Tuber melanosporum</i>      |
| FG247591.1     | GenBank | C.zea-maydis     | <i>Cercospora zea-maydis</i>   |
| CO033831.1     | GenBank | C.posadasii      | <i>Coccidioides posadasii</i>  |
| EX805973.1     | GenBank | L.bicolor        | <i>Laccaria bicolor</i>        |
| WP_088241413.1 | GenBank | C.rhizosoleniae  | <i>Calothrix rhizosoleniae</i> |

Footnotes:

- a) - overlapping sequences, merged to give Tuphoxin transcript of *Styela rustica*
- b) - overlapping sequences, merged under the name of *Ph.mammillata.1.2*

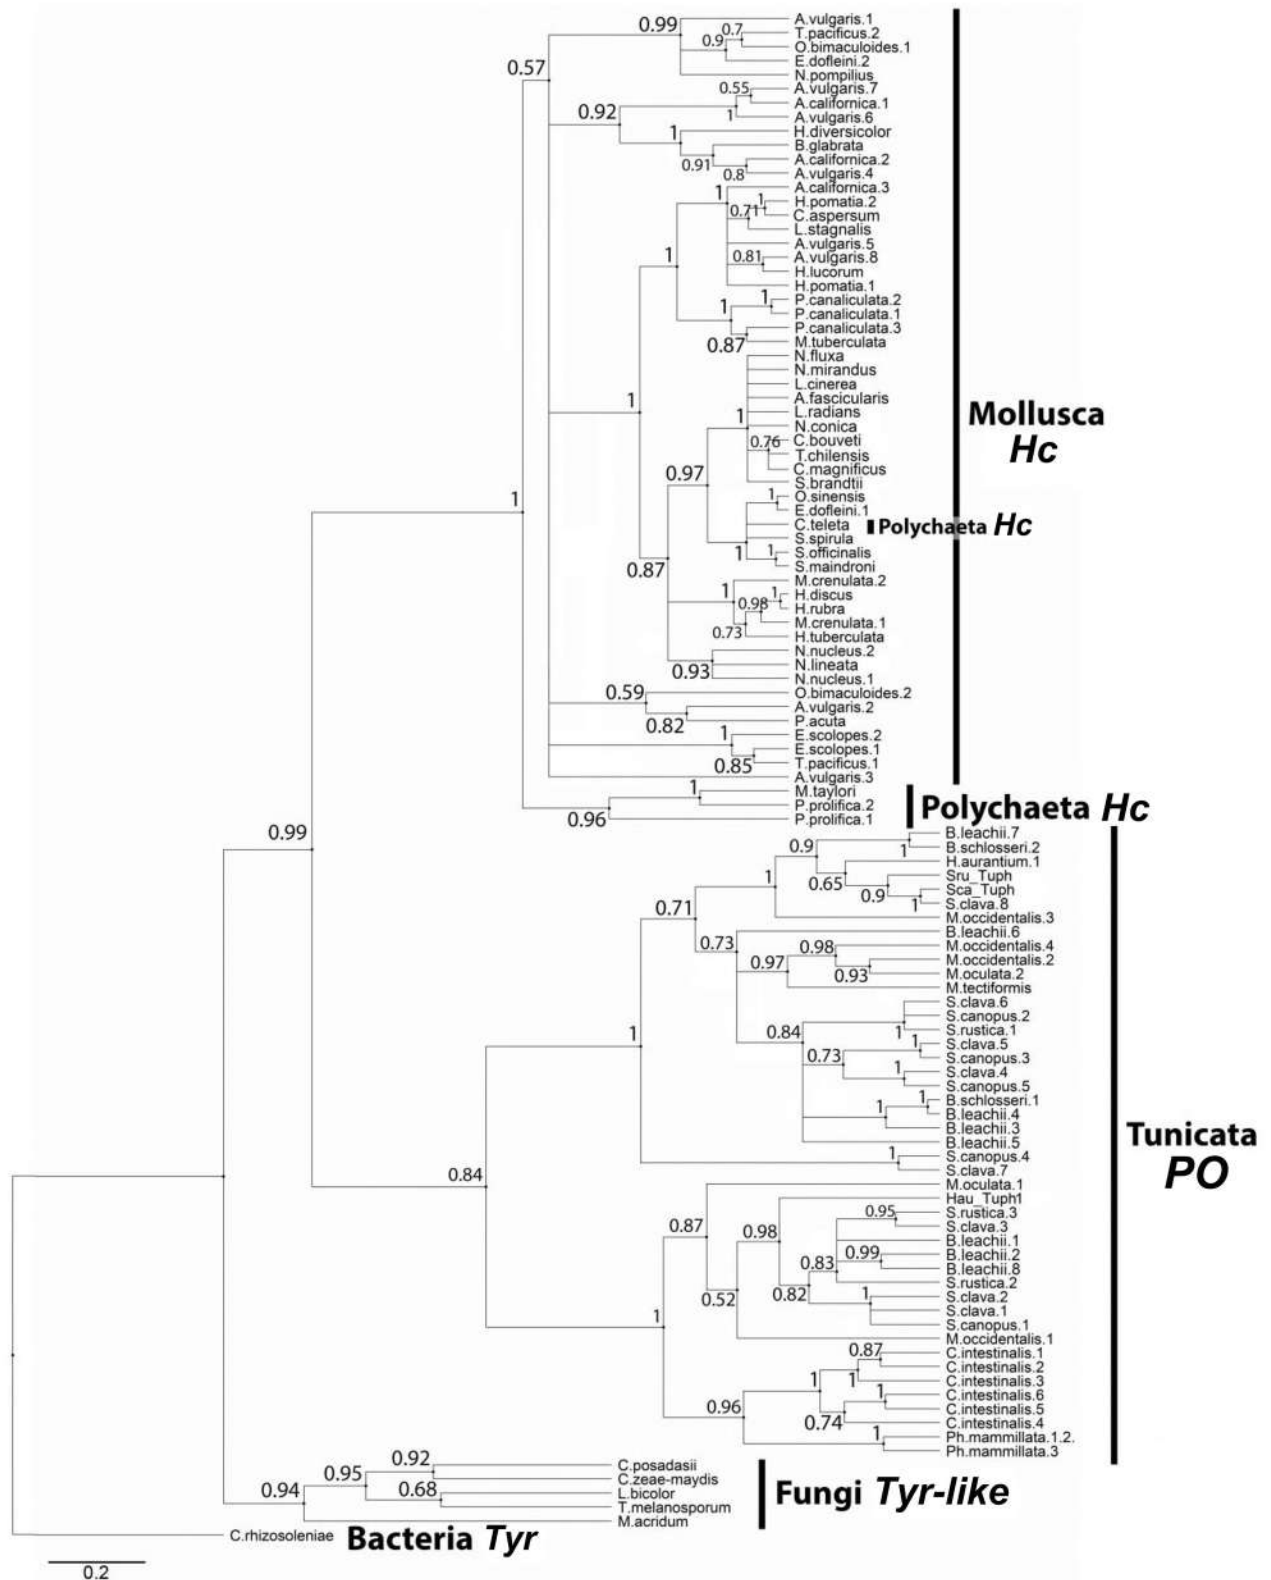

**Supplementary Figure S9. Phylogenetic analysis of tyrosinase domains of *Tufphoxin* homologues.** Phylogenetic tree based on Bayesian Inference (BI) rooted by bacterial sequence. Statistical support (posterior probabilities) are indicated at the nodes. Only posterior probabilities >0.5 are shown. Accession numbers of the proteins used in this tree can be found in Supplementary Table S1.

**Supplementary Table S2 Arthropod-like phenol oxidases of ascidians used for phylogeny construction.**

| Database ID    | Sequence name     | Species                     | Protein name | Citation                     |
|----------------|-------------------|-----------------------------|--------------|------------------------------|
| XP_018671030.1 | C.intestinalis.7  | <i>Ciona intestinalis</i>   | tyr1         | Aguilera et al., 2013        |
| NP_001029009.2 | C.intestinalis.8  | <i>Ciona intestinalis</i>   | tyr3         | Aguilera et al., 2013        |
| CAD68058.1     | C.intestinalis.9  | <i>Ciona intestinalis</i>   | tyr4         | Aguilera et al., 2013        |
| AJ547814       | C.intestinalis.10 | <i>Ciona intestinalis</i>   |              | Immesberger, Burmester, 2004 |
| ALM04212.1     | B.schlosseri.3    | <i>Botryllus schlosseri</i> | HLP          | Ballarin et al., 2012        |





**Supplementary Table S3. Number of unique alleles of *Tuphoxin* homologues present in Tunicata.** Eleven ascidian species discussed in the present study are listed with number of alleles in each of two clades of Tunicata homologues. Clades are supported by maximum likelihood (ML) inference of phylogenetic relations.

| species                      | number of unique alleles |          |
|------------------------------|--------------------------|----------|
|                              | clade I                  | clade II |
| <i>Styela rustica</i>        | 2                        | 2        |
| <i>Styela canopus</i>        | 5                        | 1        |
| <i>Styela clava</i>          | 5                        | 3        |
| <i>Halocynthia aurantium</i> | 1                        | 1        |
| <i>Phallusia mammillata</i>  | 0                        | 1        |
| <i>Molgula oculata</i>       | 1                        | 1        |
| <i>Molgula occidentalis</i>  | 3                        | 1        |
| <i>Molgula tectiformis</i>   | 1                        | 0        |
| <i>Ciona intestinalis</i>    | 0                        | 6        |
| <i>Botryllus schlosseri</i>  | 2                        | 0        |
| <i>Botrylloides leachii</i>  | 5                        | 3        |





**Supplementary Table S4. Presence or absence of TSP1 domain and/or cupredoxin-like sequence (CuOx-like) in full length homologues of *Tuphoxin* belonging to Tunicata.**

| Database ID                          | Name                 | Species                     | TSP1 | CuOx-like |
|--------------------------------------|----------------------|-----------------------------|------|-----------|
| Phfumi.CG.MTP2014.S5765.g07096.01.p  | Ph.mammillata.1.2    | <i>Phallusia mammillata</i> |      |           |
| CAB3267405.1                         | Ph.mammillata.3      | <i>Phallusia mammillata</i> |      |           |
| Moocul.CG.ELv1_2.S110138.g11514.01.p | M.oculata.1          | <i>Molgula oculata</i>      |      |           |
| Moocul.CG.ELv1_2.S61057.g03850.01.p  | M.oculata.2          | <i>Molgula oculata</i>      |      |           |
| Moocci.CG.ELv1_2.S255256.g05916.01.p | M.occidentalis1      | <i>Molgula occidentalis</i> |      |           |
| Moocci.CG.ELv1_2.S565922.g22193.01.p | M.occidentalis2      | <i>Molgula occidentalis</i> |      |           |
| Moocci.CG.ELv1_2.S454880.g14754.01.p | M.occidentalis3      | <i>Molgula occidentalis</i> |      |           |
| Moocci.CG.ELv1_2.S568724.g22364.01.p | M.occidentalis4      | <i>Molgula occidentalis</i> |      |           |
| CJ410700.1.p3                        | M.tectiformis        | <i>Molgula tectiformis</i>  |      |           |
| XP_002122867.2                       | C.intestinalis.1     | <i>Ciona intestinalis</i>   |      |           |
| XP_026691523.1                       | C.intestinalis.2     | <i>Ciona intestinalis</i>   |      |           |
| XP_018672468.2                       | C.intestinalis.3     | <i>Ciona intestinalis</i>   |      |           |
| XP_018671739.2                       | C.intestinalis.4     | <i>Ciona intestinalis</i>   |      |           |
| XP_002119675.4                       | C.intestinalis.5     | <i>Ciona intestinalis</i>   |      |           |
| XP_002128425.2                       | C.intestinalis.6     | <i>Ciona intestinalis</i>   |      |           |
| Boleac.CG.SB_v3.S604.g12287.01.p     | B.liachii.1          | <i>Botrylloides leachii</i> |      |           |
| Boleac.CG.SB_v3.S604.g12288.01.p     | B.liachii.2          | <i>Botrylloides leachii</i> |      |           |
| Boleac.CG.SB_v3.S227.g05332.01.p     | B.liachii.3          | <i>Botrylloides leachii</i> |      |           |
| Boleac.CG.SB_v3.S227.g05333.01.p     | B.liachii.4          | <i>Botrylloides leachii</i> |      |           |
| Boleac.CG.SB_v3.S227.g05334.01.p     | B.liachii.5          | <i>Botrylloides leachii</i> |      |           |
| Boleac.CG.SB_v3.S227.g05338.01.p     | B.liachii.6          | <i>Botrylloides leachii</i> |      |           |
| Boleac.CG.SB_v3.S195.g04406.01.p     | B.liachii.7          | <i>Botrylloides leachii</i> |      |           |
| Boleac.CG.SB_v3.S281.g06648.01.p     | B.liachii.8          | <i>Botrylloides leachii</i> |      |           |
| AA49_m.7122.p1                       | S.clava.1            | <i>Styela clava</i>         |      |           |
| AA49_m.7119.p1                       | S.clava.2            | <i>Styela clava</i>         |      |           |
| AA49_m.30831.p1                      | S.clava.3            | <i>Styela clava</i>         |      |           |
| AA49_m.87151.p1                      | S.clava.4            | <i>Styela clava</i>         |      |           |
| AA49_m.2942.p1                       | S.clava.5            | <i>Styela clava</i>         |      |           |
| AA49_m.30764.p1                      | S.clava.6            | <i>Styela clava</i>         |      |           |
| AA49_m.72475.p1                      | S.clava.7            | <i>Styela clava</i>         |      |           |
| AA49_m.3326.p1                       | S.clava.8            | <i>Styela clava</i>         |      |           |
| SC_m.117002.p1                       | <b>Sca_Tuphoxin</b>  | <i>Styela canopus</i>       |      |           |
| SC_m.152480.p1                       | S.canopus.1          | <i>Styela canopus</i>       |      |           |
| SC_m.16402.p1                        | S.canopus.2          | <i>Styela canopus</i>       |      |           |
| SC_m.86302.p1                        | S.canopus.3          | <i>Styela canopus</i>       |      |           |
| SC_m.42250.p1                        | S.canopus.4          | <i>Styela canopus</i>       |      |           |
| SC_m.26137.p1                        | S.canopus.5          | <i>Styela canopus</i>       |      |           |
| Contig_28777+NODE_67444              | <b>Sru_Tuphoxin</b>  | <i>Styela rustica</i>       |      |           |
| Contig_7091                          | S.rustica.1          | <i>Styela rustica</i>       |      |           |
| Contig_7704                          | S.rustica.2          | <i>Styela rustica</i>       |      |           |
| Contig_15578                         | S.rustica.3          | <i>Styela rustica</i>       |      |           |
| Haaura.CG.MTP2014.S1292.g08050.02    | <b>Hau_Tuphoxin1</b> | <i>H.aurantium</i>          |      |           |
| Haaura.CG.MTP2014.S1209.g07864.01    | H.aurantium.1        | <i>H.aurantium</i>          |      |           |
| JG332329.1.p1                        | B.schlosseri.1       | <i>Botryllus schlosseri</i> |      |           |
| JG338731.1.p1                        | B.schlosseri.2       | <i>Botryllus schlosseri</i> |      |           |

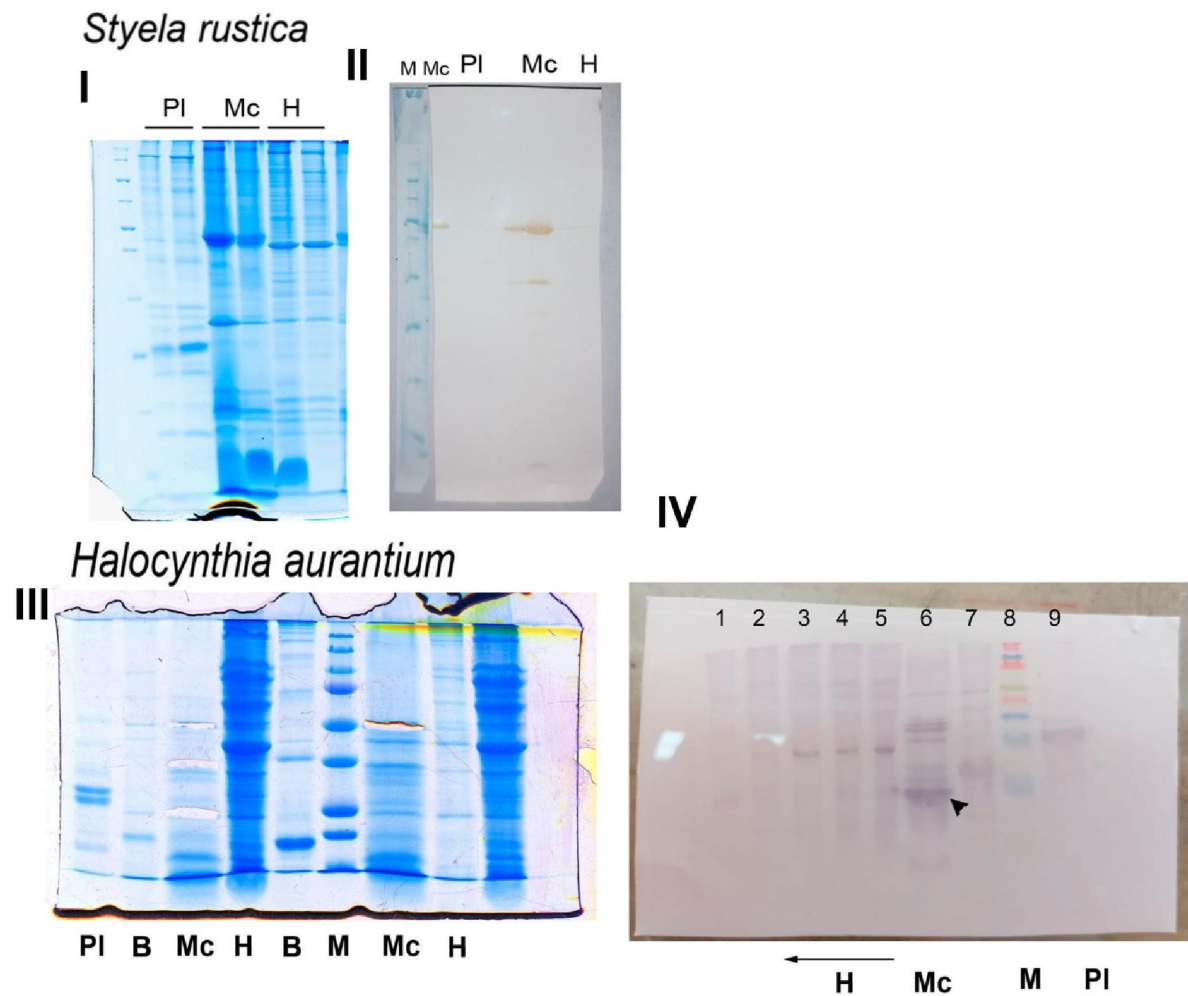

Supplementary Figure S12. Examples of the original electrophoresis and immunoblot of the blood cells from the species indicated. I, III - SDS electrophoresis; II, IV - immunoblot. Hyalinocytes (H), morula cells (Mc), blood plasma (PI), bottom fraction of degranulated cells (B) and marker proteins ladder (M) At III the lines visible cut out for MALDI. At IV arrow at the bottom indicate the decreasing loading of hyalinocyte fraction; arrowhead indicate the false positive signal belongs to the debris. The polished image aligned according to the markers is shown at Figure 2 in the text.

>Sru\_Tuph\_cloned cDNA

CGTATCGCGATGCATCTAGATTGCACTGCGAGGTTGTCATACCTGTATCCCAGCAATTCCTGTAGTAAAACATATTCTGGATGCTGGCGAGTTCCTGAAGCTTTTTGAATGGAGTGAGAG  
TCTTGTCTGAAACGGCAGGTATGGTTCATTGAAATGGAAGATGTTTTCTTGAGGTTCAAGCACAGACTGTCTGGTCCAAGCTTCTTCGCCATGAGCTGACATCCAGTTTTGGAAAACGGA  
GAAAAGTCTGTCGACGTTTGCATGATGAAAAAGAAGACTGGATCGAATCCCAGCATATGTGAGACTACCCATTGAGTAGGTACATTTGCCAGCGGCTGATTCCCTTTCCCAGCAAATAGCA  
GCACGAATGGTGTGTGAGAGTTCTCAAGAGCCTCGGAAAACCTCATGGATGGTGTGTGACTGCATCAACTTTTGTGCAACATAGTAGTTGTCTTCGACACTTTGACCATGAAAGGATAGA  
CCGTGGGGGAACGTTGTGTCAGGGTATGCGGGGTAGTGTGTCGATCGAATAGTCATGGACGTAAACGGATTTTCTTGCCGTATAGTTTCTTGCTCCAAACCAATGCAGGCGGCTCAGGATA  
TTTAAGCCAGTCCCAGTAAGGCAATCCTAGAGTTTTATCTTTGAGATGCCTTGTAAGTCCTTCTTCAAAGTTCAATAATTCAGCTCTGTGCCACATTGCAAAGTTGAGTCTTGACCATGG  
TAGCAACATCCTGCCATATTTCCATCTGGTCCCATGCACTGATAAGGAAAAGACGTGAGTCCCAGCCGATTGTGGAATCCAAAATTGCTAGTATCCTTTTTGTATTTCTCATCGCTTGAA  
TAAGATCTTTCTTCTGTACTCGGTTTCAAGTGAATGAGCCTCTCTCCTGACACGCAATTTGCATTTTCTCCCGGTGTAGCATTCCTTGTATTTCAGTTGCTGGTCCCTTTACACCTGCCTTCTCC  
CACAAGGCCATGTTTGCAAAATACGAGTCCGGGTCTGAATTCACCTGAACAGGTTGGTTTGCATGTGTTCCAACAGCTCCATGTTTCCCATTTAGCTTCGGTATCAAAGACGTTCTTTACC  
GTCCACTTTAGGCCAACGCAGACATAATTGATGATGATGTCAGTTTTGCCATCAACATCTACATCAAACCTTTGCACTCTCTTTGCTCCTCCGGTCTTGCAAGTTTTATACATGAGTGTAT  
GAAAA

**Supplementary data 1. A sequence of *S.rustica* tuphoxin cloned fragment.**



M.occidentalis. --MNDTGTHEWPYQCRS----STGINGACCYHGAKLNFLSWHRVEIKNFEMGLTRYL-----KDKTLGMPY  
 B.leachii.7 GFWAAGGTHVFPNQCV----HVSNGPGCCYHGARLNFAIWHRAELLNIEEGITRYM-----KDKTLGLPY  
 B.schlosseri.2 GFWAAAGTHVFPNQCID---HATGNPGCCYHGARLNFAIWHRAELLNIEEGLIRHL-----KSKTLGLPY  
 Hau GYHQAAGTHFWPNECVK----PNGVSGACCYHGAKVNFVMWHRAELLYEQGLTRHL-----KDKKLGAPY  
 Sca GFHNAGGTHEFPPQCMG----SSGEDKGCYHGARLNFMWHRAELLNFEEGLSRHL-----RDKTLGLPY  
 S.clava.8 GFHNAGGTHEFPPQCMG---SDGKDKGCCFHGAKLNFAMWHRAELLNFEEGLTRHL-----KDKTLGLPY  
 M.acridum GYFQISGIHGLPFIENRGGARNDGWWGGYCPHGAL-FLPWHRPFVLLFEQLLVEHAVGIASQYPARYRGQYMAAANNLRSPY  
 T.melanosporum GYYQVAGVHGTPYIPWMEKA-DADDRAGDYCTHGAL-FLTWHRPYLLLFEQRIVEEALTIARNFSDKYRAEYEEAALNIRIPY  
 C.zae-maydis -VQKCADCOGA-----DGYCTHDSVH-FPAWHRPYMALFEQELMRVAFDIASSFSGAFGDRLKAAAQKLRAPY  
 C.posadasii SYDVSSIHGYPFEAWDG---VEGIGGGGYCAHASTI-FPTWHRPYLALFEEMIWNHAQVIARGYRDSLSTYVEAARTLRIPY  
 C.rhizosoleniae GYEQIAGLHGFPDW-----ECPHGGLK-FLPWHRAYLLRFEQALQRYV-----PDVTLPLY  
 L.bicolor SFFQVGGIHLPLYPWDGVTGIPNPTWGGYCTHGSVL-FPTWHRPYVSAFEQILWTRAQEVAAATYTVD-QAAWKAATTLRQPY  
 BLOCKs SFFQVGGIHLPLYPWD-----YCTHGF--FPTWHRPYVSAFEQI-----ATTLRQPY

cons . : \* \* \* \* \* : \*

M.occidentalis. WNWLE-Y---SS---PPPLLV-SKTL-----YGATNPFAEPMEVRLDE-----SNIRK  
 B.leachii.7 WNWLE-E---NK---APDFVW-SKTL-----NGKPNPLAH-IIIRHDL-----TPPQP  
 B.schlosseri.2 WNWLE-D---NK---APDFVW-SKTY-----NGKPNPFAN-VIIRYDL-----TPHQA  
 Hau WDWLV-Y---PN---PPQLVW-AKTI-----GGKPNPFAG-SKIRYDL-----PVVIS  
 Sca WDWLT-Y---PN---PPPLVW-SKLL-----YNKANPPTS-GLVRYDT-----KPHTL  
 S.clava.8 WDWLT-Y---PN---PPPLVW-SKLL-----FKKDNPPTS-MTIRYDV-----TPNIV  
 M.acridum WDWSADS---NV---PPCTVP-ERVS-VNIP-----NGQNLRRIEIRNPLST-YKYPREA---LDGEF---GEFSKTPQMARC  
 T.melanosporum WDWATDSD-----VPQSIR-FAETDITLPEVGSAPPV-TRKGVNPMYS-YKFKTSIRRQRDFSIVGVQEMVAWEETKRC  
 C.zae-maydis WDWAAVPDPGTPV---LPTVMT-AQQVTI-----EGPN-GQETVDNPLYS-YHFNDSS---DMAY---AVFTTWPDTFRW  
 C.posadasii WDWASNP---E---LPRCVV-TPQIRI-----TTPN-GEATIKNPLYS-YTINPTA---GKGFPPRDPLSQYPDTRVA  
 C.rhizosoleniae WDWISQE---SQRNGLPNAVA-ESTY-----FDA-EGVEVLNPLYS-AQIPIGG-----ETIRR  
 L.bicolor WDWAVNS-----V---PPDEVIKQTVSI-----TGHDGKKKDVANPLYH-YTFHPI---DPSFP---SPYSGWKTTLRQ  
 BLOCKs WDWA-----PPDEV-----

cons \* : \* \* \* \* \* :

M.occidentalis. T-----ERIAQPVP-AHVEVARGIYQNETVNL-QSADMIHEFSES-----LESSHNLIHMAVC-PMTPNSKA  
 B.leachii.7 L-----QRDNTTQL-SSILQARSIYLTAMKL-MESHTLHEFSEE-----LENAHNWIHTAAC-PY--ETPA  
 B.schlosseri.2 V-----QRDTTDF-NFIKLARDIYLTITIRL-MKAHSLFRFSEE-----LENAHNWIHSSAC-PH--ETSA  
 Hau T-----ARSPAVSS-SSVSMAKSIFQTITSKL-ARSHMIHEYSES-----LESSHNNIHSAVC----HADTG  
 Sca T-----QRSPTVDP-FMVKMSKDNY-YVARKL-MQSHSIHEFSEA-----LENSHNTIHSSICWGAQQKAGK  
 S.clava.8 T-----QRSPTVDP-FMVKTSKDNY-YVARKM-MQSHSIHEFSEA-----LENAHNSIHSSICWGAQQNQNK  
 M.acridum PDPG--RYPDSANQELQD-----YRLKQATYDIFTTASNHFHQFAVRG-----RVVHLEELHNDVHYSAA-----  
 T.melanosporum PDEKGISHPEIVDRQLRIPTVNPTAGSSFRDPIYKLLTLVGSYGAFGNTGWQTGRPGPNNISLEHYHNIHTFTG-TNYIEEKF  
 C.zae-maydis PNSNNVDAHSQQDQCID--AFTNSNGNLRDQIYQLLTQCKSYLGFATDA--SGDQ-RCANSLEGIHNTVHLNAG-GPGY-NGI  
 C.posadasii PDDEGQSQMEEVQRRLRA-----NGAYFRQATYSLLSSEPNYTIFSTSA--VRDRGNYYNNLETIHGQVHVAVG-GPG-----  
 C.rhizosoleniae P-----GQISRLSELENPVAIAM--QENNFVDFSGR-----IENPHNFIHVWVG-GNG-----  
 L.bicolor PTSLQPD--ATDNIVRLRQVLGNAQSNIRSNTYNLLTRVTTWPAFSNHT--VGDGGSTSNSLEAIHDGIHVYVG-GNG-----  
 BLOCKs -----RVTTWPAFSNH-----EAIHDGIHVYVG-----

cons : . \* \* . : \*

M.occidentalis. CEVSMGSLTYAAFDPFMFHHTNVDRFLFSQF  
 B.leachii.7 CTYSMGQLTYAAYDPLFFMHHTNVDRQIARL  
 B.schlosseri.2 CTFSMGQLEYAAYDPLFFMHHTNVDRQIARM  
 Hau CDYSMGELEYAAYDPIFFFHHANVDRLFSVF  
 Sca CEFSMGGLTYAAFDPVFFFHHTNVDRFLFSVF  
 S.clava.8 CTYSMAGLTYAAFDPVFFFHHTNIDRLFSVF  
 M.acridum CKGQFFDAELSGFEPLFMFHHTQVDRLW---  
 T.melanosporum QEGHMSEVGVSAFDPIFWLHHCNVD-----  
 C.zae-maydis SGGHMAFLPLASYDPLFFLHHANVDRLVTLY  
 C.posadasii --GHMTYVPWSSFDPIFWLHHCNVDRLLLAMW  
 C.rhizosoleniae --GSMSNVTFAAFDPIFWMHHSYVDRQWYIW  
 L.bicolor ---QMGDPAVAGFDPIFFLHHCNVDRLLSLW  
 BLOCKs --GQMGDPAVAGFDPIFFLHHCNVD-----

cons : : : \* \* : \*\* : \*

**Supplementary data 2. Alingment of Tunicate and fungal phenol oxidase proteins. BLOCKs indicate the most conservative regions. Color meaning for alignment: BAD AVG GOOD**
